# Supplementary material
Source: Elsevier journal article supplement (https://www.sciencedirect.com/science/article/pii/S2238785418304447)
Supplement: mmc1 [file S2238785418304447:mmc1.docx]

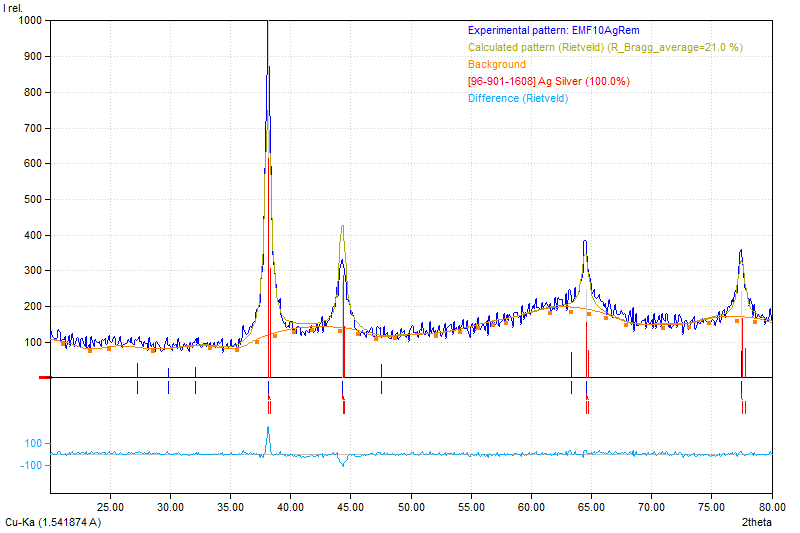


Figure 1. Rietveld Refinement Ag-Pa


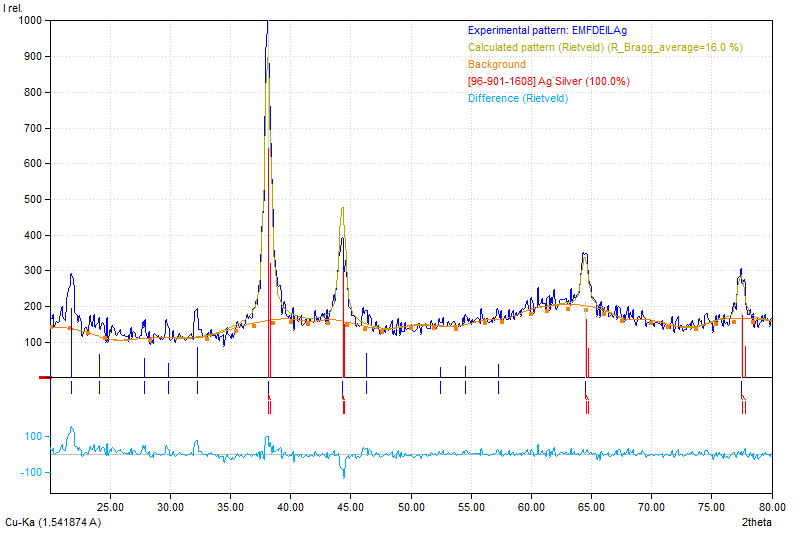


Figure 2. Rietveld Refinement Ag-Pa[EMIm][Tos]


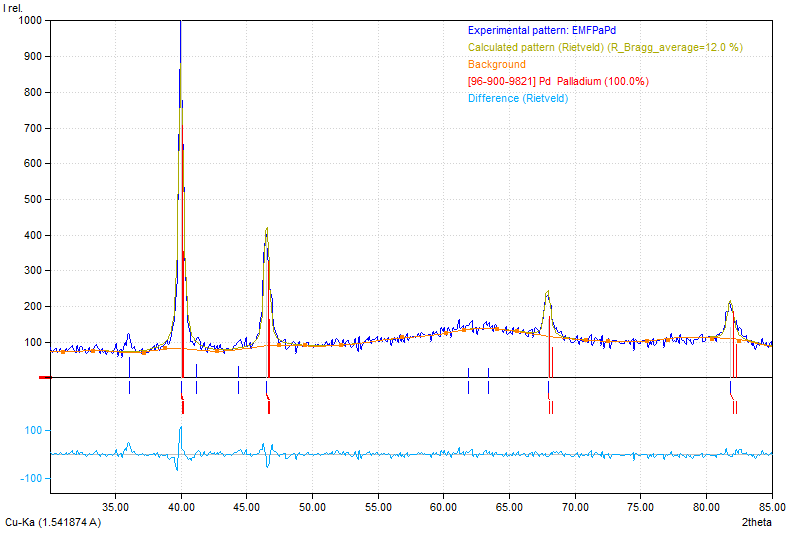


Figure 3. Rietveld Refinement Pd-Pa


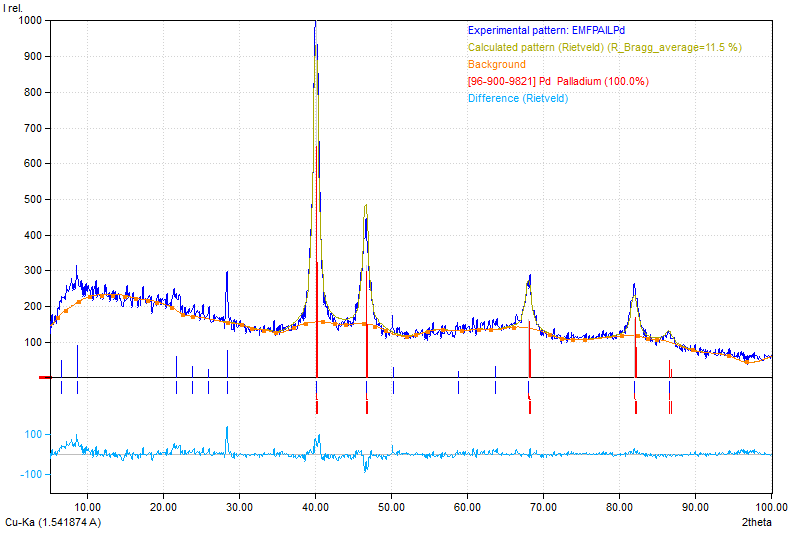


Figure 4. Rietveld Refinement Pd-Pa[EMIm][Tos]
